# Supplementary material for: Ru-doped WO3 enabling efficient hydrogen oxidation reaction in alkaline media
Source: Royal Society of Chemistry journal article supplement (doi:10.1039/d2nr06628a), 2023-01-01
Supplement: d2nr06628a1.pdf [file d2nr06628a1.pdf]

## Electronic Supplementary Information

### **Ru doped WO<sub>3</sub> Enabling Efficient Hydrogen Oxidation Reaction in Alkaline Media**

Hai Liu,<sup>a</sup> Zhuang Zhang,<sup>a</sup> Mengxuan Li,<sup>a</sup> Yaping Li,<sup>\*a</sup> Yun Kuang,<sup>a</sup> and Xiaoming Sun<sup>\*a</sup>

---

<sup>a</sup> *State Key Laboratory of Chemical Resource Engineering, Beijing University of Chemical Technology Beijing 100029 (China).*

<sup>b</sup> *Corresponding authors email: [liyp@mail.buct.edu.cn](mailto:liyp@mail.buct.edu.cn); [sunxm@mail.buct.edu.cn](mailto:sunxm@mail.buct.edu.cn)*

## Figures and Tables

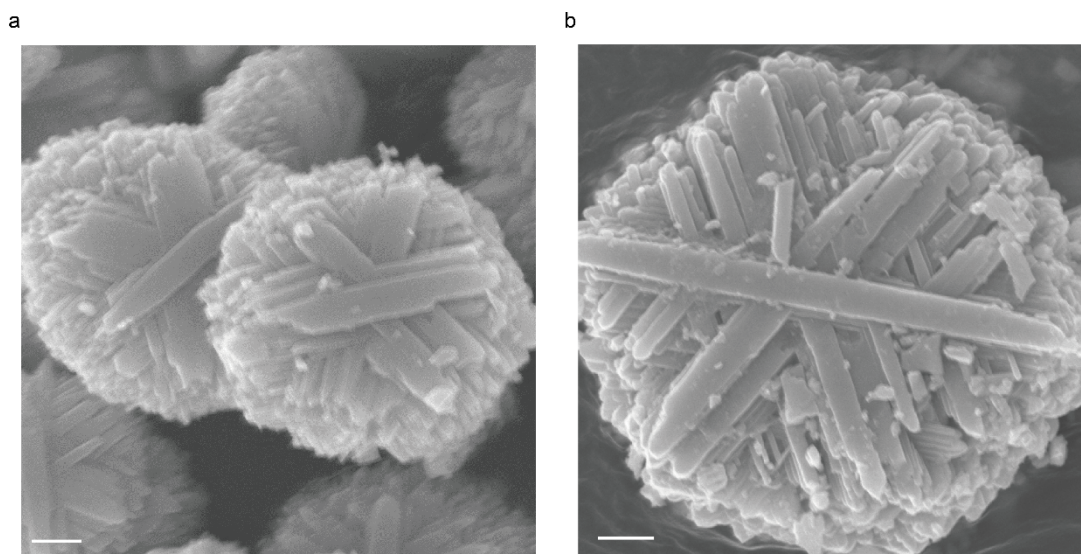

**Figure S1.** SEM images for Ru-WO<sub>3</sub> with different ratios at 200 nm scale. a) 5% Ru. b) 10% Ru.

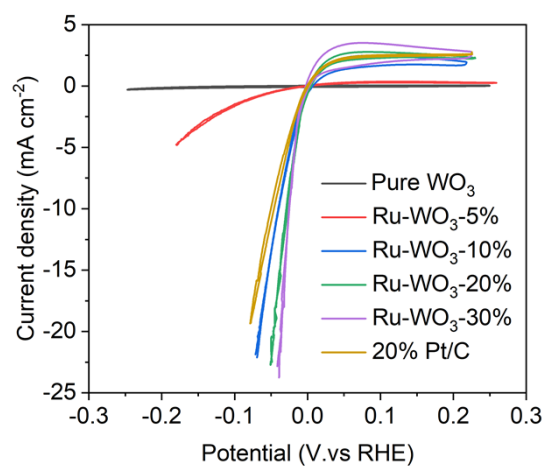

**Figure S2.** Corresponding cv curves for Ru-WO<sub>3</sub>, pure WO<sub>3</sub> and 20% Pt/C measured in 0.1 M KOH with H<sub>2</sub>.

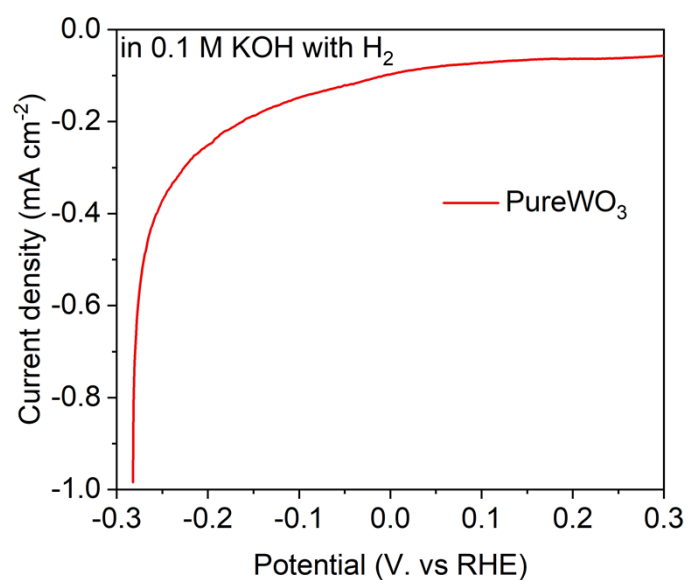

**Figure S3.** Polarization curve for pure WO<sub>3</sub> in 0.1 M KOH at a scan rate of 5 mV/s.

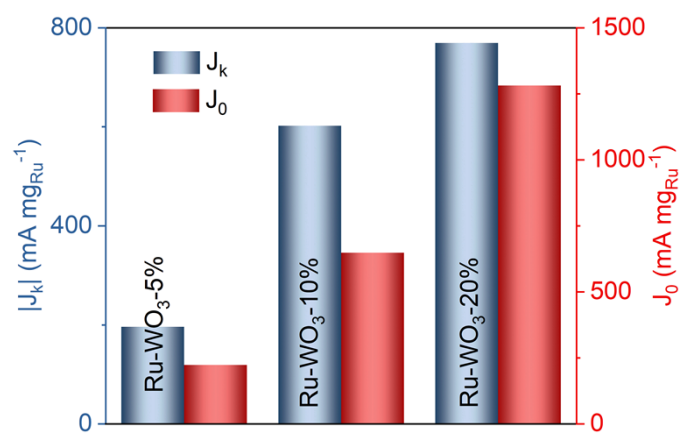

**Figure S4.** The kinetic current density and exchange current density normalized to the mass loading of Ru.

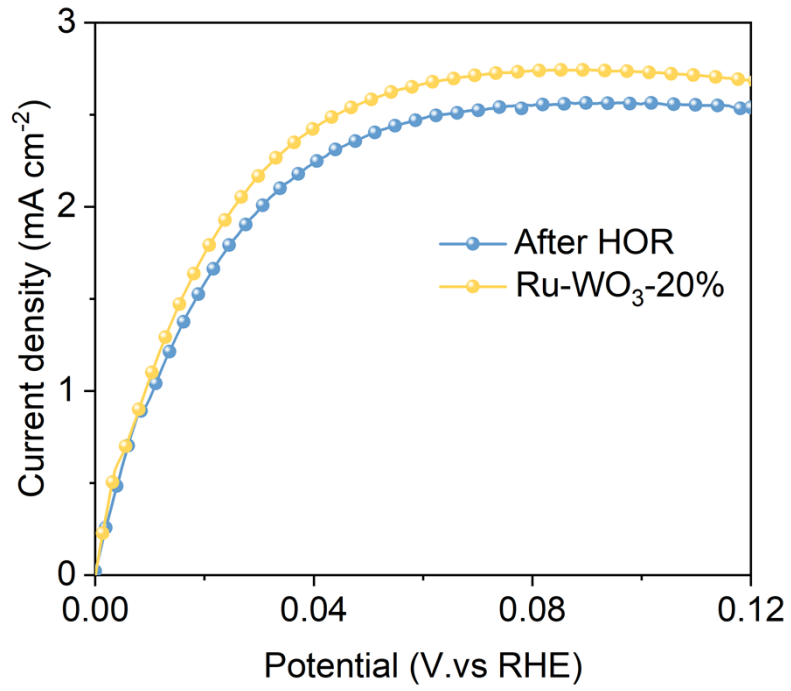

**Figure S5.** Polarization curves for Ru-WO<sub>3</sub>-20% before and after durability test at 0.1 V vs. RHE.

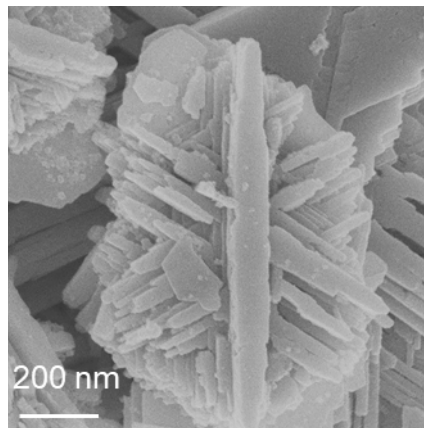

**Figure S6.** SEM image of Ru-WO<sub>3</sub>-20% after chronoamperometry test

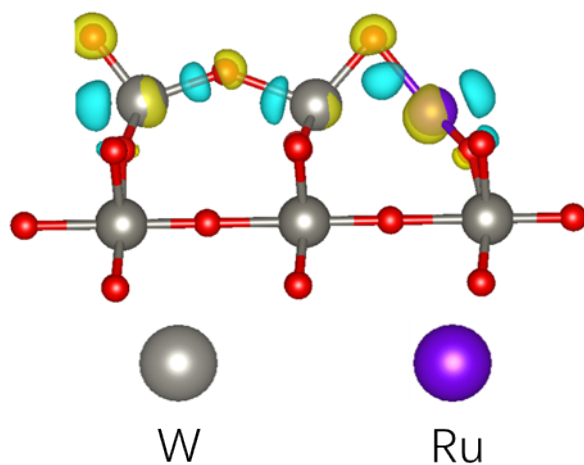

**Figure S7.** The electron density difference in Ru doped  $\text{WO}_3$ .

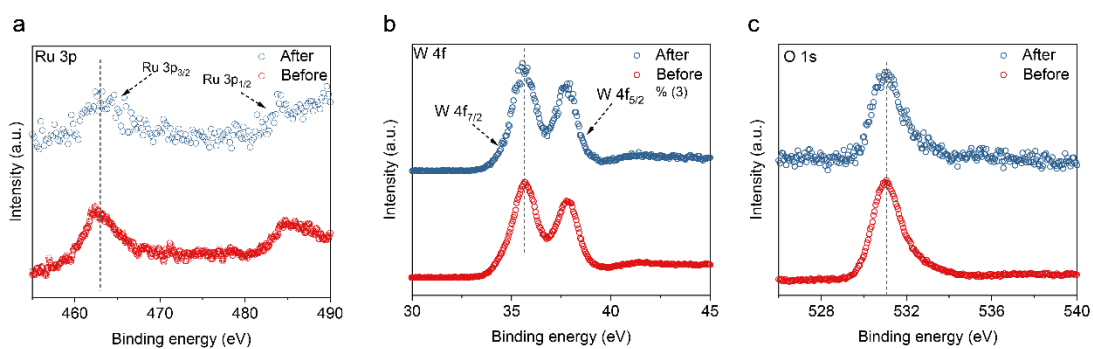

**Figure S8.** XPS spectra of Ru- $\text{WO}_3$ -20% after chronoamperometry test. a) Ru 3p XPS spectra. b) W 4f XPS spectra. c) O 1s XPS spectra.

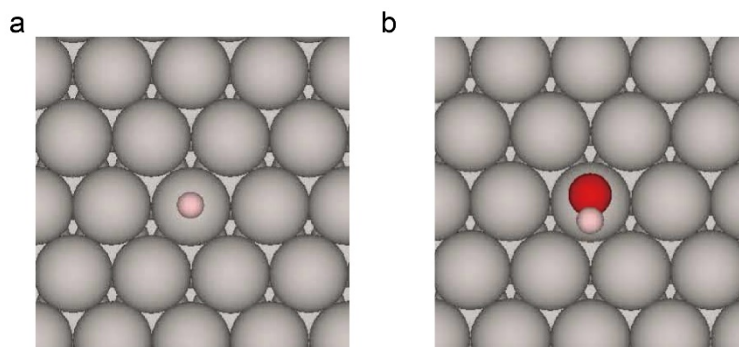

**Figure S9.** a) H\* adsorption model on Pt (111) plane. b) OH\* adsorption model on Pt (111) plane.

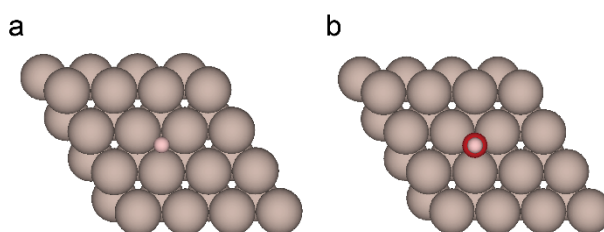

**Figure S10.** a) H\* adsorption model on Ru (0001) plane. b) OH\* adsorption model on Ru (0001) plane.

**Table S1.** EDS results for Ru-WO<sub>3</sub>.

| sample                  | W (at%) | Ru (at%) | Total |
|-------------------------|---------|----------|-------|
| Ru-WO <sub>3</sub> -5%  | 97.36%  | 2.74%    | 100%  |
| Ru-WO <sub>3</sub> -10% | 94.76%  | 5.24%    | 100%  |
| Ru-WO <sub>3</sub> -20% | 90.61%  | 9.39%    | 100%  |
| Ru-WO <sub>3</sub> -30% | 89.24%  | 10.76%   | 100%  |

**Table S2.** Comparison of exchange current density ( $j_0$ ) between this work and reported Ru-based HOR catalysts

| <b>Catalyst</b>             | <b><math>j_0</math> (mA cm<sup>-2</sup>)</b> | <b>Electrolyte</b> | <b>Ref</b> |
|-----------------------------|----------------------------------------------|--------------------|------------|
| Ru-WO <sub>3</sub>          | 12.81                                        | 0.1 M KOH          | This work  |
| Ru Colloidosomes            | 2.86                                         | 0.1 M KOH          | 1          |
| Ru <sub>c</sub> /NHCS       | 1.74                                         | 0.1 M KOH          | 2          |
| Ru-Cr <sub>1</sub> (OH)-1.1 | 5.8                                          | 0.1 M KOH          | 3          |
| O-RuNi@C-400                | 1.56                                         | 0.1 M KOH          | 4          |
| HEA NSWs                    | 6.42                                         | 0.1 M KOH          | 5          |
| Ru/Ni-NiO@C                 | 4.44                                         | 0.1 M KOH          | 6          |
| Ru/Meso C                   | 9.23                                         | 0.1 M KOH          | 7          |
| Pt-Ru                       | 2.98                                         | 0.1 M KOH          | 8          |
| Ru modified Pt              | 5.52                                         | 0.1 M KOH          | 9          |
| RuO <sub>2</sub> -Pt/C      | 4.77                                         | 0.1 M KOH          | 10         |

|                                    |      |           |    |
|------------------------------------|------|-----------|----|
| Ru <sub>7</sub> Ni <sub>3</sub> /C | 1.8  | 0.1 M KOH | 11 |
| Ru-Ni diatomic sites               | 2.69 | 0.1 M KOH | 12 |
| RuP@NOC                            | 2.64 | 0.1 M KOH | 13 |
| Ru@Pt <sub>2</sub> MLE             | 1.78 | 0.1 M KOH | 14 |
| RuRh-Co                            | 1.91 | 0.1 M KOH | 15 |

**Table S3.** Values of  $\Delta G_{H^*}$ ,  $E_{H^*}-E^*$ ,  $\Delta EZPE$  and  $T\Delta S$  for H\* adsorption.

| Catalysts          | $\Delta G_{H^*}$ (eV) | $E_{H^*}-E^*$ (eV) | $\Delta EZPE$ (eV) | $T\Delta S$ (eV) |
|--------------------|-----------------------|--------------------|--------------------|------------------|
| Ru-WO <sub>3</sub> | -0.015                | -0.297             | 0.077              | -0.205           |
| Pt (111)           | -0.110                | -0.342             | 0.047              | -0.205           |
| Ru (0001)          | -0.296                | -0.523             | 0.022              | -0.205           |

**Table S4.** Values of  $\Delta G_{OH^*}$ ,  $E_{OH^*}-E^*$ ,  $\Delta EZPE$  and  $T\Delta S$  for H\* adsorption.

| Catalysts          | $\Delta G_{OH^*}$ (eV) | $E_{OH^*}-E^*$ (eV) | $\Delta EZPE$ (eV) | $T\Delta S$ (eV) |
|--------------------|------------------------|---------------------|--------------------|------------------|
| Ru-WO <sub>3</sub> | -0.582                 | -1.03               | -0.020             | -0.470           |
| Pt (111)           | 1.450                  | 1.038               | -0.058             | -0.470           |
| Ru (0001)          | 0.230                  | -0.181              | -0.058             | -0.470           |

## Reference

1. X. Yang, B. Ouyang, P. Shen, Y. Sun, Y. Yang, Y. Gao, E. Kan, C. Li, K. Xu and Y. Xie, *Journal of the American Chemical Society*, 2022, **144**, 11138-11147.
2. G. Meng, H. Cao, T. Wei, Q. Liu, J. Fu, S. Zhang, J. Luo and X. Liu, *Chemical Communications*, 2022, **58**, 11839-11842.
3. B. Zhang, B. Zhang, G. Zhao, J. Wang, D. Liu, Y. Chen, L. Xia, M. Gao, Y. Liu, W. Sun and H. Pan, *Nature Communications*, 2022, **13**, 5894.
4. X. Zhang, Z. Li, X. Sun, L. Wei, H. Niu, S. Chen, Q. Chen, C. Wang and F. Zheng, *ACS Materials Letters*, 2022, **4**, 2097-2105.
5. C. Zhan, Y. Xu, L. Bu, H. Zhu, Y. Feng, T. Yang, Y. Zhang, Z. Yang, B. Huang, Q. Shao and X. Huang, *Nature Communications*, 2021, **12**, 6261.



6. Y. Yang, Y. Huang, S. Zhou, Y. Liu, L. Shi, T. T. Isimjan and X. Yang, *Journal of Energy Chemistry*, 2022, **72**, 395-404.
7. L. Zeng, H. Peng, W. Liu, J. Yin, L. Xiao, J. Lu and L. Zhuang, *Journal of Power Sources*, 2020, **461**, 228147.
8. G. Wang, W. Li, N. Wu, B. Huang, L. Xiao, J. Lu and L. Zhuang, *Journal of Power Sources*, 2019, **412**, 282-286.
9. S. Zhu, X. Qin, F. Xiao, S. Yang, Y. Xu, Z. Tan, J. Li, J. Yan, Q. Chen, M. Chen and M. Shao, *Nature Catalysis*, 2021, **4**, 711-718.
10. S. Panigrahy, R. Samanta, P. Panda, R. Mishra and S. Barman, *International Journal of Energy Research*, 2022, **46**, 6406-6420.
11. Y. Xue, L. Shi, X. Liu, J. Fang, X. Wang, B. P. Setzler, W. Zhu, Y. Yan and Z. Zhuang, *Nature Communications*, 2020, **11**, 5651.
12. L. Han, P. Ou, W. Liu, X. Wang, H.-T. Wang, R. Zhang, C.-W. Pao, X. Liu, W.-F. Pong, J. Song, Z. Zhuang, M. V. Mirkin, J. Luo and H. L. Xin, *Science Advances*, **8**, eabm3779.
13. P. Wang, C. Wang, Y. Yang, S. Chen, Z. Cheng, M. Huang, H. Tong and Q. Chen, *Advanced Materials Interfaces*, 2022, **9**, 2102193.
14. J. N. Schwämmleina, H. A. El-Sayed, B. M. Stühmeiera, K. Wagenbauerb, H. Dietzb and H. A. Gasteiger, *ECS Trans.*, 2016, **75**, 971-982
15. Y. Cui, Z. Xu, D. Chen, T. Li, H. Yang, X. Mu, X. Gu, H. Zhou, S. Liu and S. Mu, *Nano Energy*, 2021, **90**, 106579.
